# Supplementary material for: Intracellular signalling pathways and cytoskeletal functions converge on the psoriasis candidate gene CCHCR1 expressed at P-bodies and centrosomes
Source: Springer Nature journal article supplement (doi:10.1186/s12864-018-4810-y), 2018-06-04
Supplement: 12864_2018_4810_MOESM8_ESM.pdf [file 12864_2018_4810_MOESM8_ESM.pdf]

## **Additional file 8: Supplementary information about qPCR and co-localization studies**

### **qPCR studies**

Pre-designed TaqMan® Gene Expression Assays:

FN1            Hs00365058\_m1

TLN1           Hs00196775\_m1

HPRT1          Hs01003267\_m1

Sequences of self-designed qPCR primers:

SYT1           F: TGCATAAAATTCCATTGCCACCG

                  R: AAAAGCAGCAGGTCAGGACT

CLCX8          F: TCTGTGTGAAGGTGCAGTTTTG

                  R: TGGGGTGGAAAGGTTTGGAGT

HPRT1          F: CCCTGGCGTCGTGATTAGT

                  R: CACCCTTTCCAAATCCTCAGC

## Colocalization studies

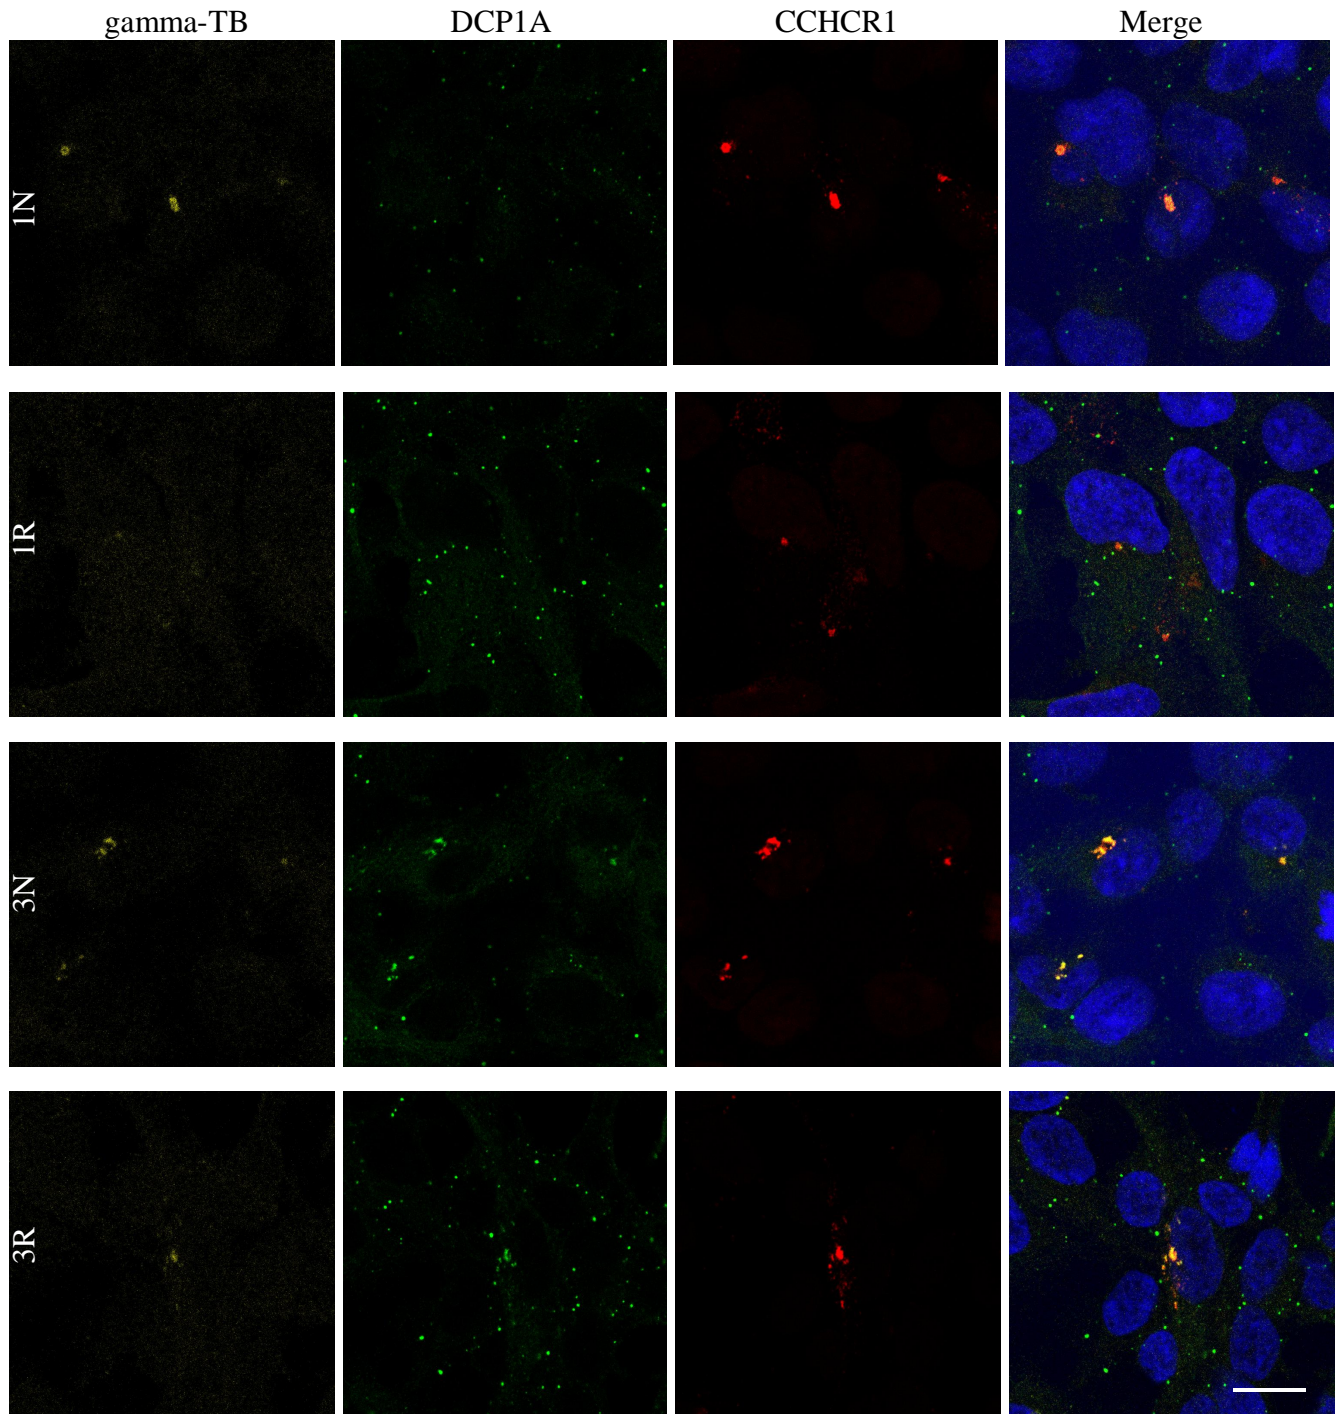

**Figure S2. Colocalization of CCHCR1 with P-body and centrosome markers.** Differences in localization of CCHCR1 isoforms Iso1Non-risk (1N), Iso1Risk (1R), Iso3Non-risk (3N), and Iso3Risk (3R) with centrosomal P-bodies were determined by counting colocalized (orange) staining of CCHCR1 (red) and DCP1A (green) in each CCHCR1-overexpressing cell line. Here shown the centrosome staining (gamma-tubulin, yellow). Nuclei are stained with DAPI (blue): Scale bar 10 nm.

Counting the colocalization of CCHCR1 with P-body markers in the CCHCR1 cell lines and calculation of p-values for the comparison between cell lines:

| 1N | 1R  | 3N      | 3R      |                 |         |
|----|-----|---------|---------|-----------------|---------|
| 1  | 0   | 2       | 2       |                 |         |
| 0  | 1   | 1       | 2       |                 |         |
| 0  | 1   | 2       | 2       |                 |         |
| 0  | 1   | 2       | 2       |                 |         |
| 1  | 0   | 2       | 2       |                 |         |
| 0  | 0   | 2       | 1       |                 |         |
| 0  | 2   | 2       | 1       |                 |         |
| 0  | 1   | 1       | 2       |                 |         |
| 0  | 0   | 1       | 1       |                 |         |
| 0  | 0   | 2       | 2       |                 |         |
| 0  | 0   | 2       | 2       |                 |         |
| 0  | 0   | 2       | 2       |                 |         |
| 0  | 0   | 2       | 2       |                 |         |
| 0  | 1   | 2       | 2       |                 |         |
| 0  | 0   | 2       | 1       |                 |         |
| 0  | 0   | 2       | 2       |                 |         |
| 0  | 0   | 2       | 1       |                 |         |
| 0  | 0   | 1       | 2       |                 |         |
|    | 0.1 |         |         | 1N vs 1R        | p-value |
|    |     | 2.8E-13 | 3.5E-12 | 1N vs 3N and 3R |         |
|    |     | 4.3E-08 | 1.3E-07 | 1R vs 3N and 3R |         |
|    |     |         | 0.7     | 3N vs 3R        |         |
|    |     | 3.9E-19 |         | Iso1 vs Iso3    |         |

0 = no colocalization with CCHCR1, 1 = faint, 2 = strong. Iso1Non-risk (1N), Iso1Risk (1R), Iso3Non-risk (3N), Iso3Risk (3R).
